# Supplementary material
Source: Springer Nature journal article supplement (https://www.springermedizin.de/resource/supplementary/12990_2010_347_MOESM1_ESM.pdf/9613084)

**A**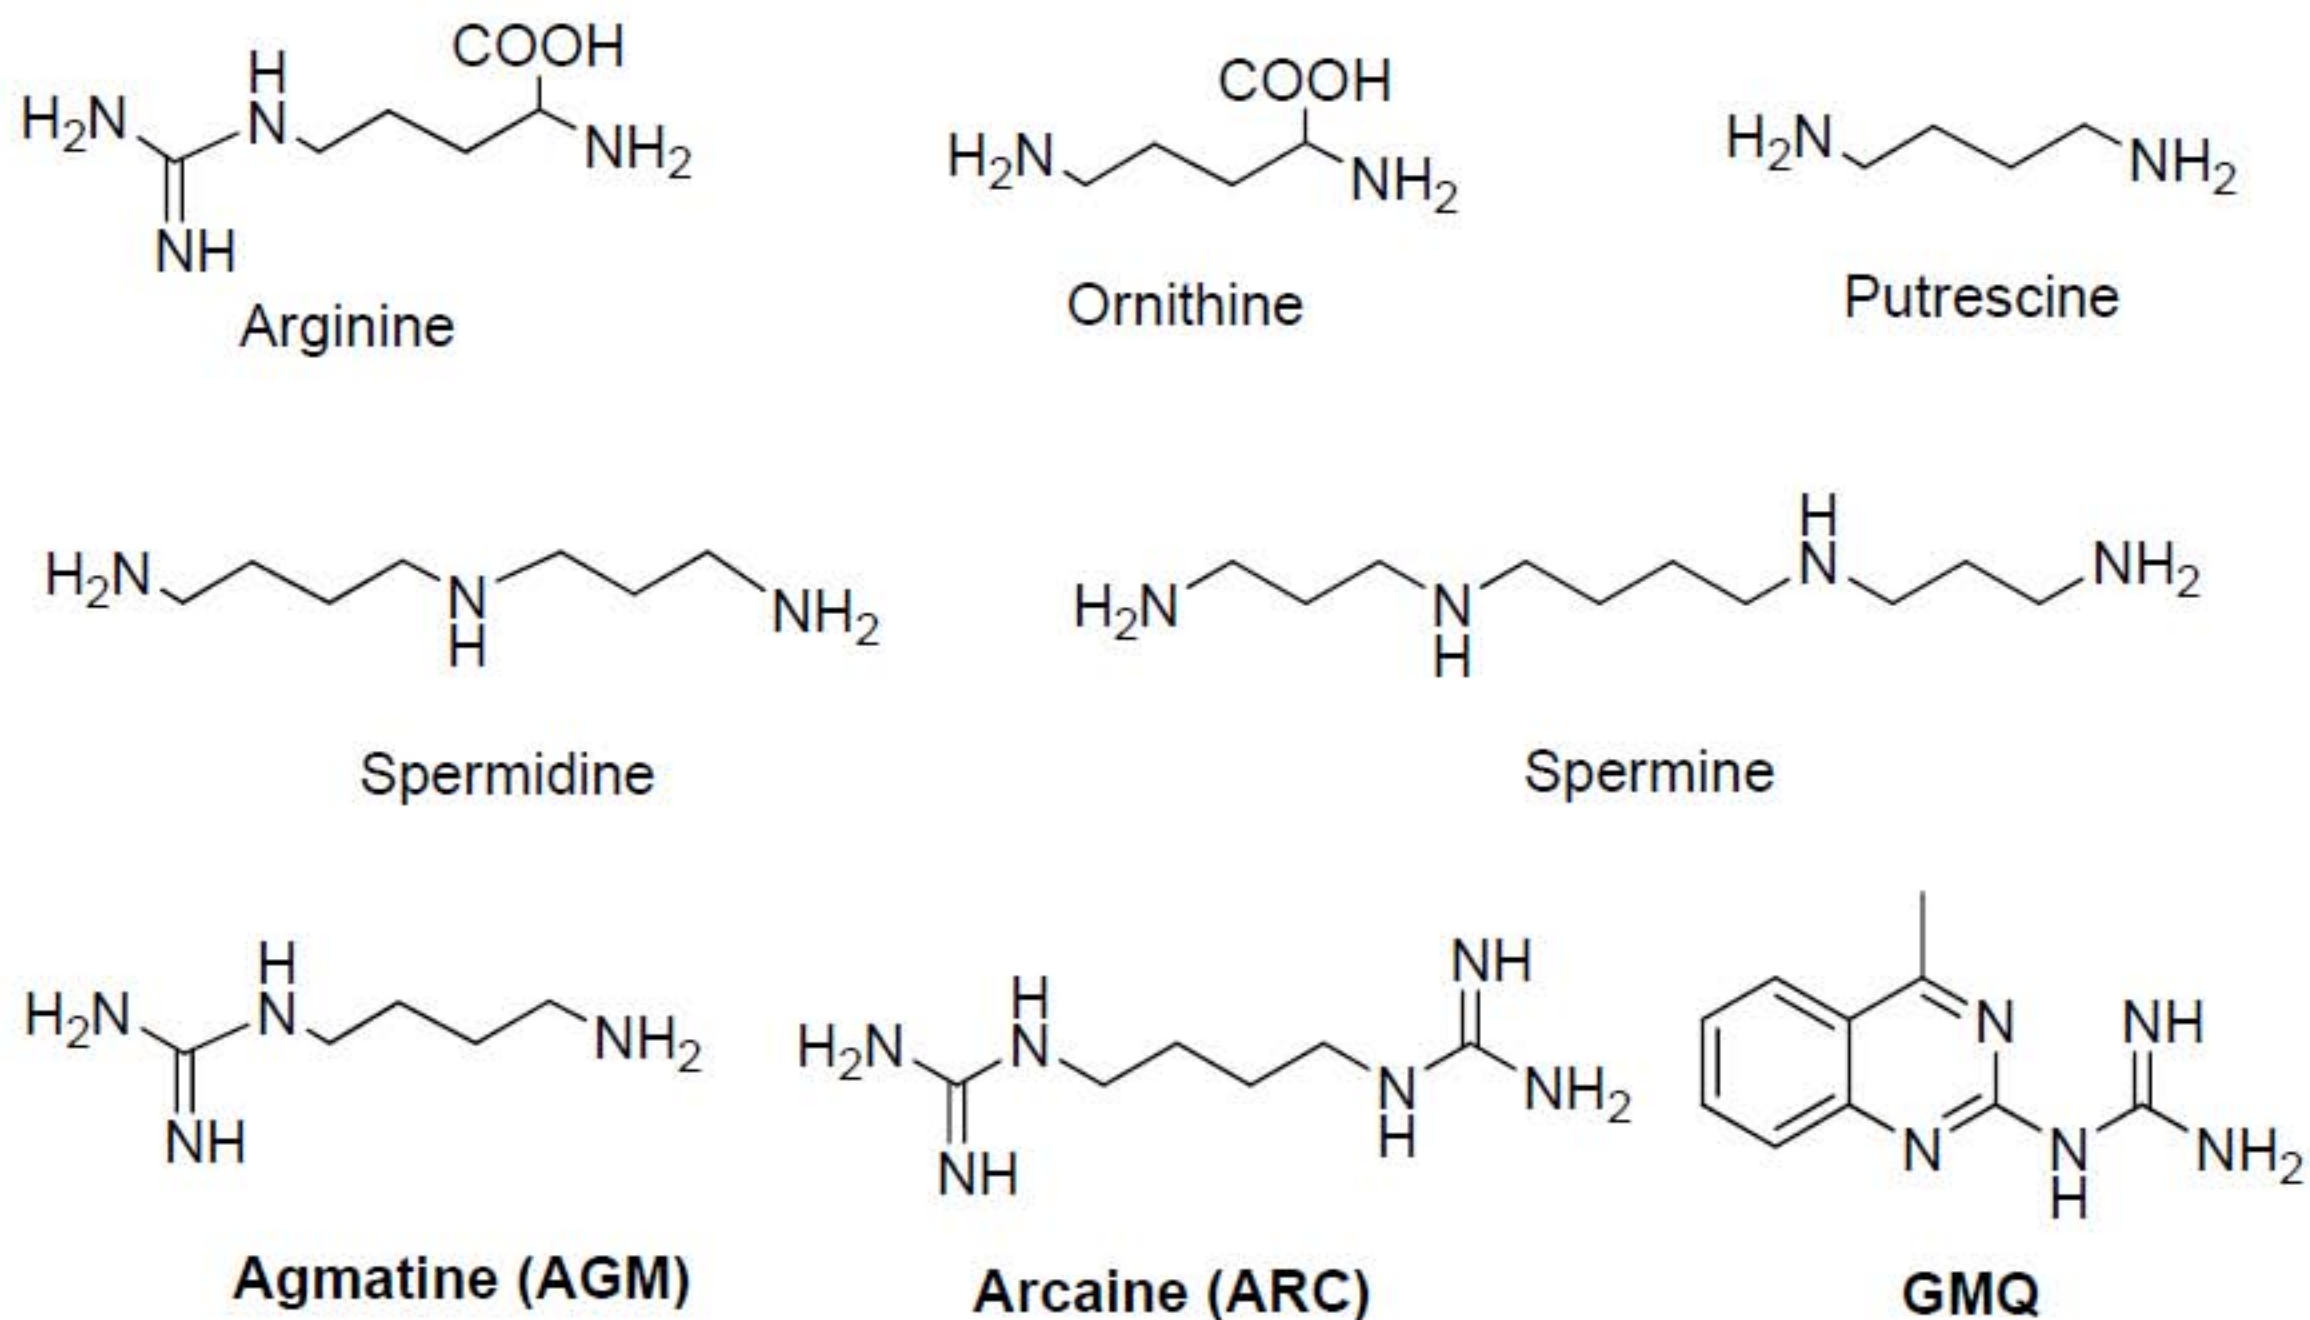**B**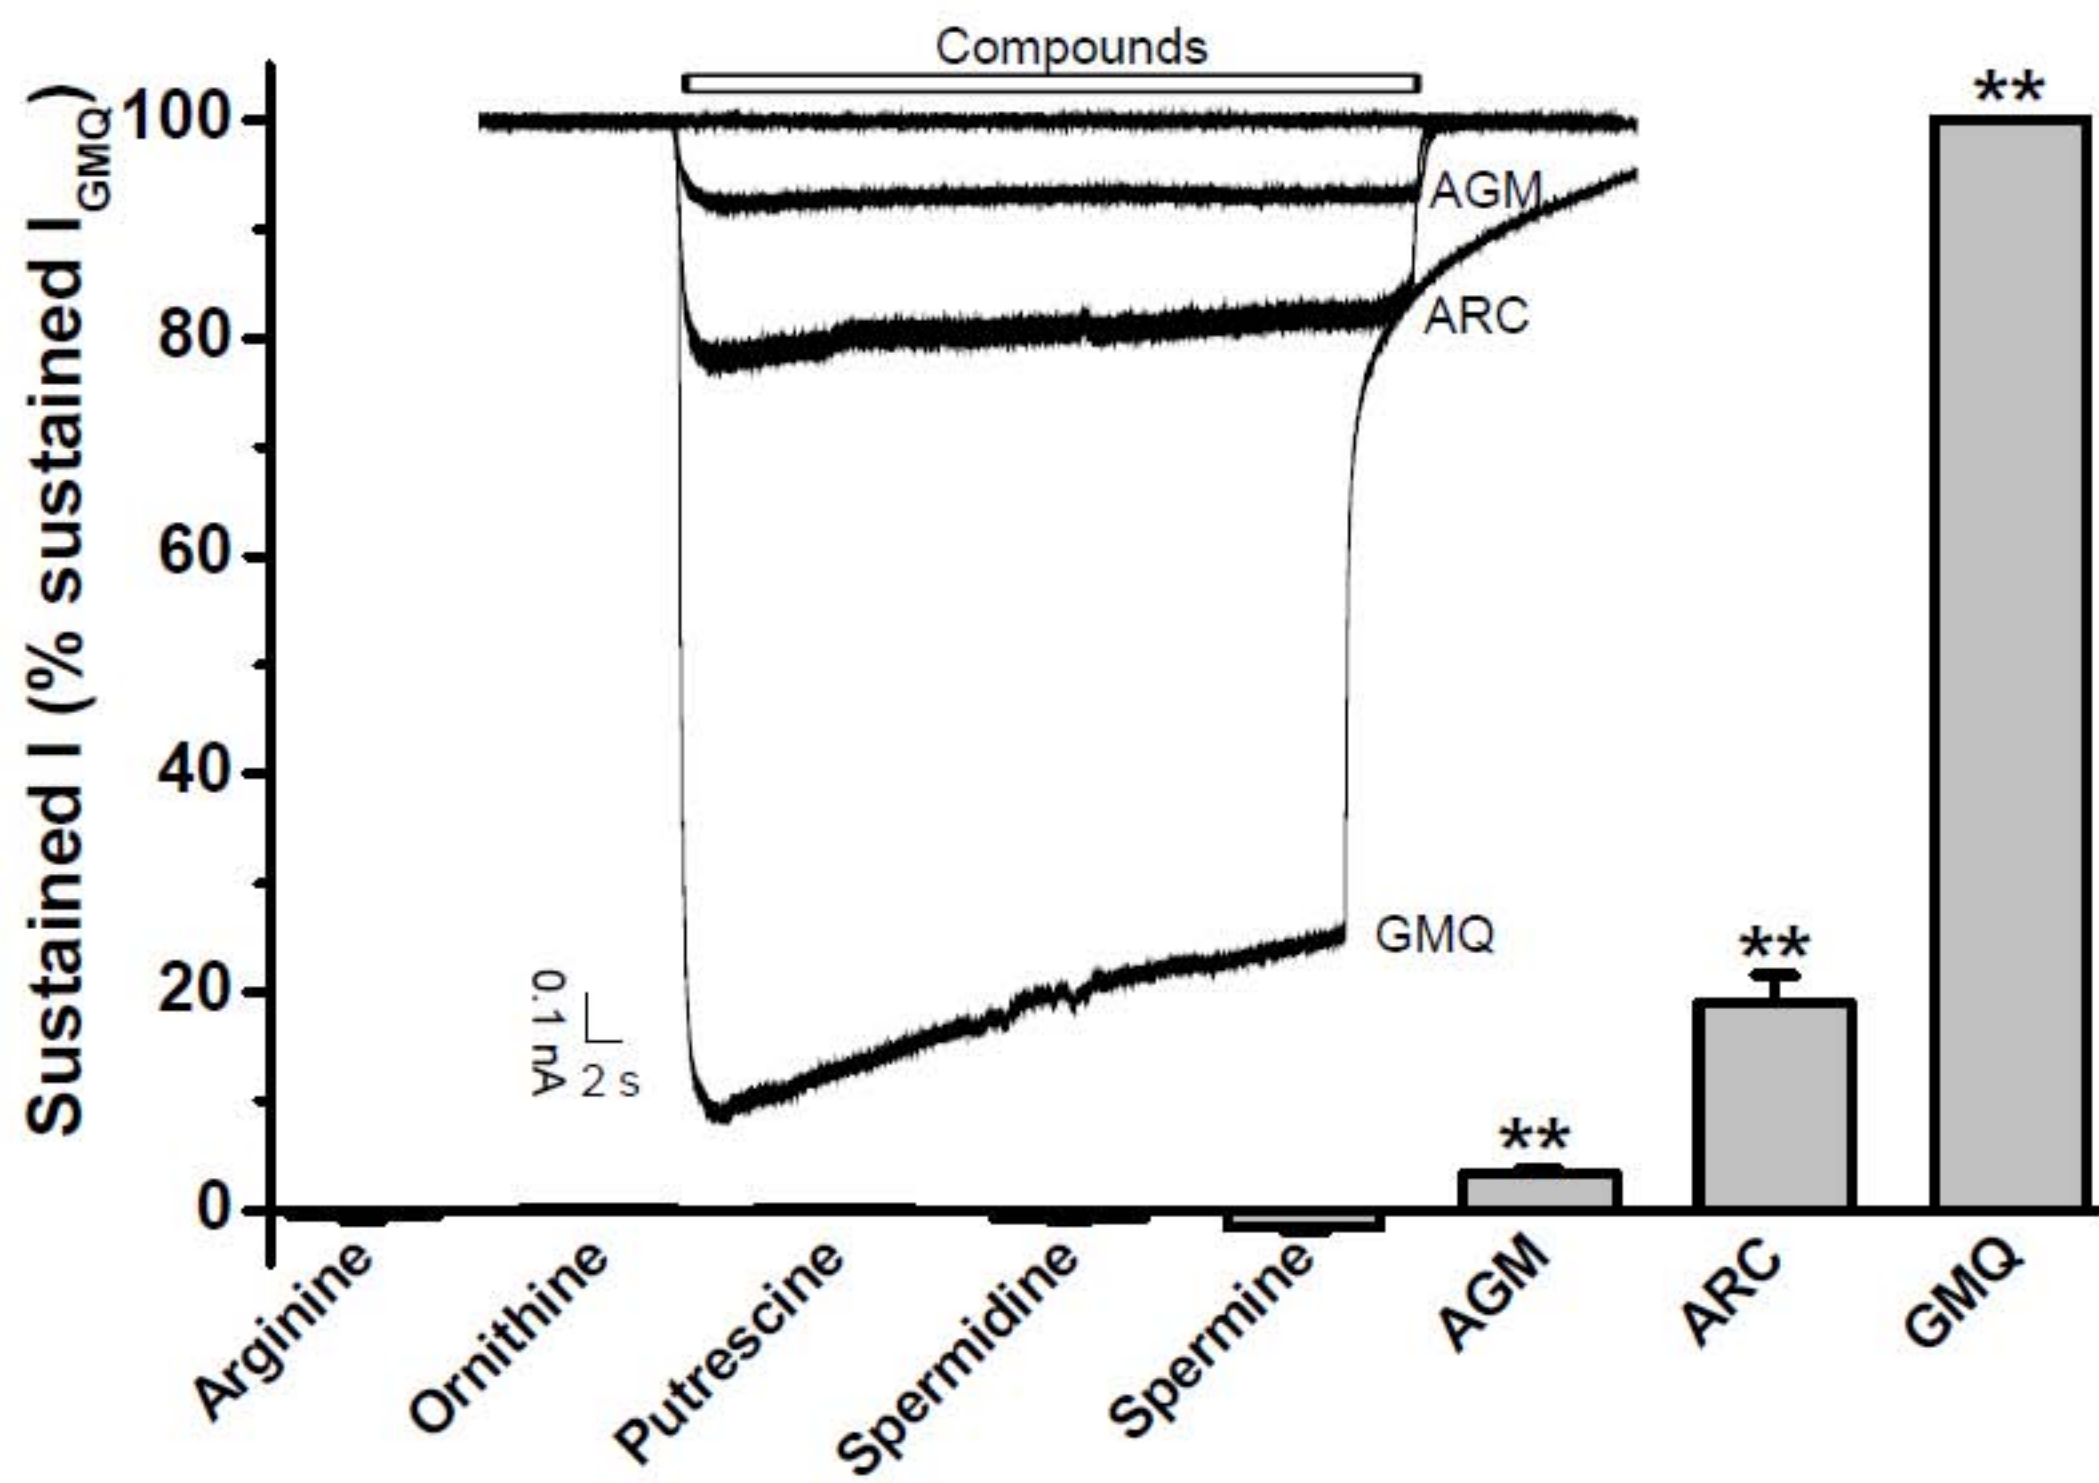

Supplement: MOESM1 [file 9613084]
